# Supplementary material for: Geospatial micro-estimates of slum populations in 129 Global South countries using machine learning and public data
Source: Copernicus journal article supplement (doi:10.5194/essd-2025-260), 2025-05-28
Supplement: Supplementary file [file essd-2025-260-AC1-supplement.pdf]

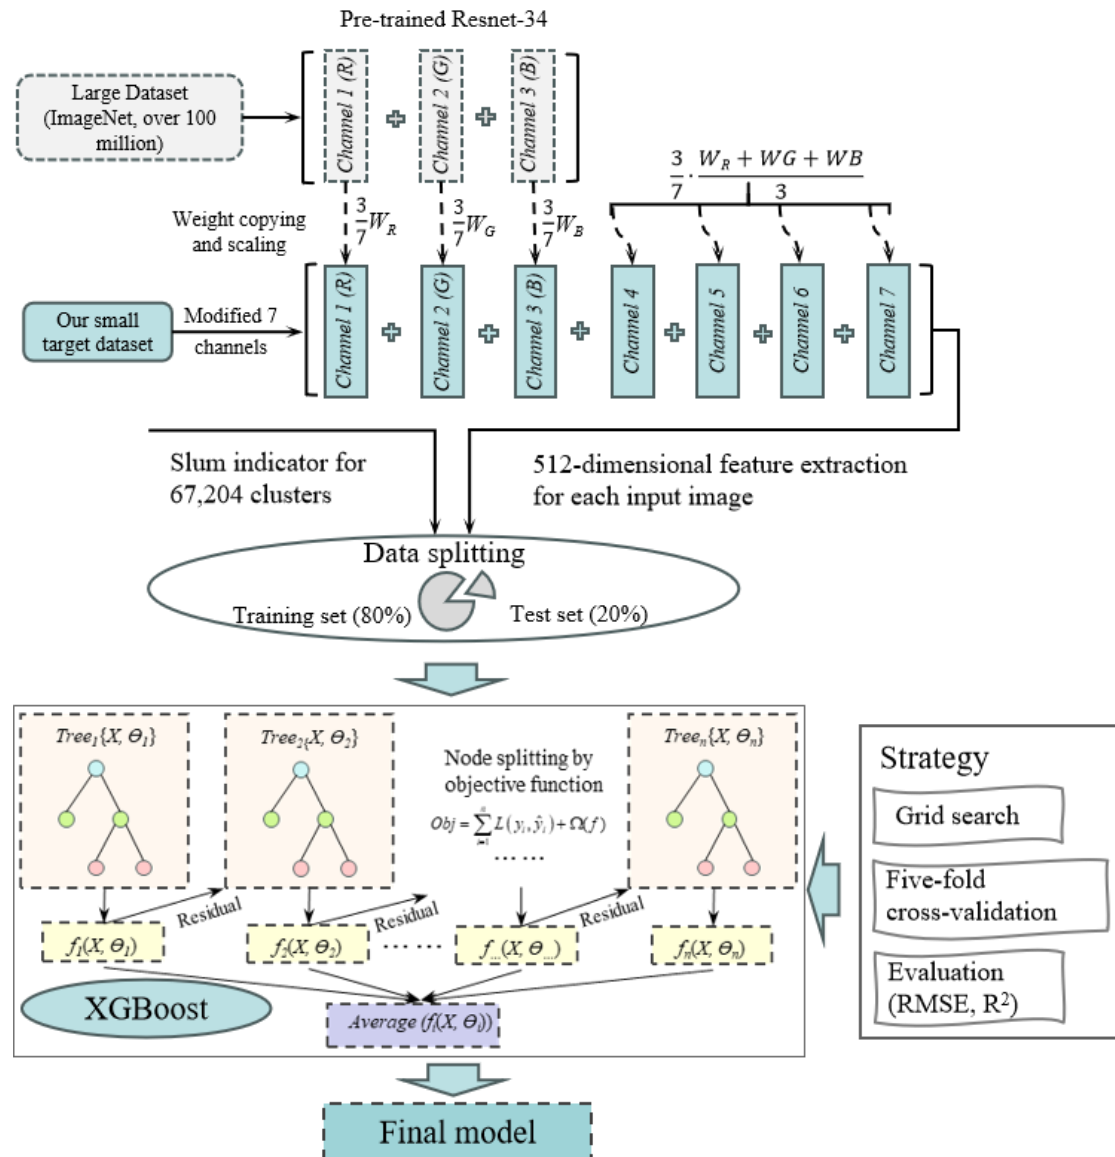

**Figure 2 Schematic of the proposed model architecture.** It integrates transfer learning by fine-tuning ResNet-34 to extract high-dimensional spatial-spectral features from multispectral imagery, followed by XGBoost regression for predictive modeling.
